# Supplementary material
Source: publisher figshare collection journal article supplement (https://springernature.figshare.com/ndownloader/files/31350743)

### Estimates of historical effective population size from computer simulations

We used the software SLiM3 to simulate a genome nucleotide sequence of 200 Mb for a population of a sexually reproducing diploid species with random mating and non-overlapping generations with population size  $N = 1000$  or  $10,000$  run for  $10,000$  generations. Neutral mutations were assumed to occur with rate  $0.5 \times 10^{-8}$  per nucleotide and generation, with a recombination frequency between consecutive nucleotides of  $2.5 \times 10^{-8}$ , thus implying an average rate of recombination of  $2.5$  cM / Mb, analogous to that found in the fish species analysed in the main text. Ten and five generations before the last one (for the scenarios of  $N = 1000$  and  $N = 10,000$ , respectively) a sudden drop in population size down to  $N = 100$  and  $N = 50$  individuals occurred, and this population size was maintained for the last nine and four generations, respectively. In the last generation, the genotypes of  $20,000$  SNPs in the  $100$  individuals were analysed for linkage disequilibrium to obtain historical estimates of the effective size with the programs GONE and the previous method from Hayes et al. [5]. Twenty simulated replicates were carried out.

The results are shown in Figure S3. The estimated historical  $N_e$  obtained with the program GONE was able to infer the drastic drops to  $N = 100$  (Figure S3a) and  $N = 50$  (Figure S3b) individuals in the last ten and five generations (respectively), although with some variation around this value. With respect to the estimation of the ancestral  $N_e$  (before the sudden drop), the estimates were unbiased with a certain variation around the true value in the case with an ancestral population of size  $N = 1000$  individuals. However, estimates of the ancestral  $N_e$  in the case of  $N = 10,000$  showed a tendency to be upwardly biased, with values in some replicates up to around  $50,000$  individuals.

Estimates obtained by the method of Hayes et al. [5] were unable to detect the drastic drop in  $N_e$ , and showed a linear decline (curvilinear because of the logarithmic scale). In the earliest generation showed in the figure (generation  $100$  in the past), the estimates of the ancestral  $N_e$  were much lower than the true ones.

**Figure S3. Estimates of  $N_e$  (logarithmic scale) obtained by computer simulations with the LD methods of Hayes et al. [5] and Santiago et al. [6] for the scenarios of 1000 (a) and 10,000 (b) individuals simulated, respectively. Red solid line: real data; black solid lines: Hayes et al. [5]; black dotted lines: Santiago et al. [6].**

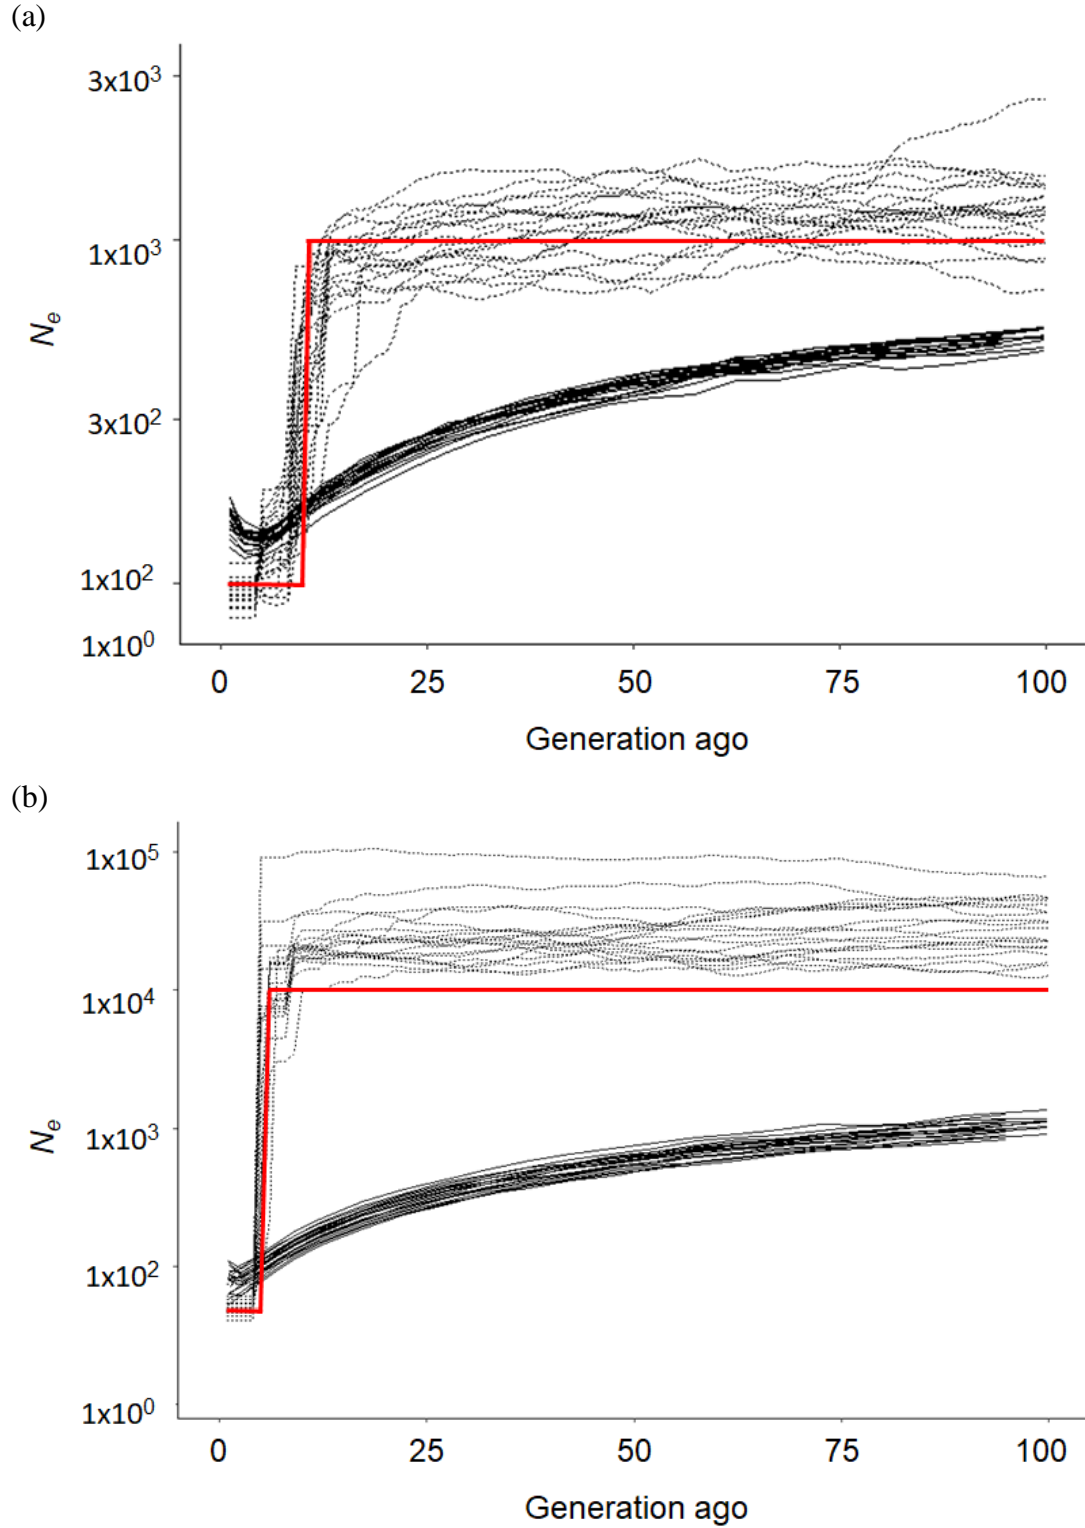

Supplement: Supplementary file [file 31350743]
